# Supplementary material for: Multi-level engineering facilitates the production of phenylpropanoid compounds in tomato
Source: PubMed Central journal article supplement (PMC4639801; doi:10.1038/ncomms9635), 2015-10-26
Supplement: ncomms9635-s1.pdf [file ncomms9635-s1.pdf]

## Supplementary Figures

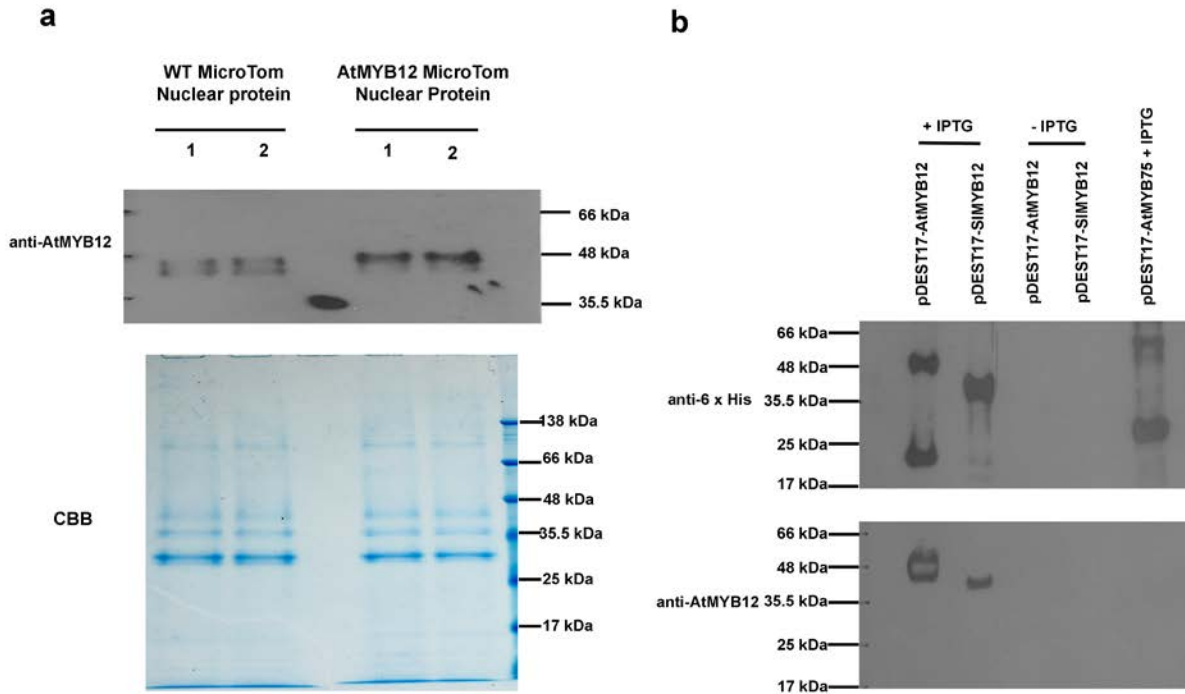

**Supplementary Figure 1. AtMYB12 antibody detects both *Arabidopsis* and tomato MYB12 protein. (a)** AtMYB12 antibody detects both SIMYB12 and AtMYB12 in tomato fruit. Both WT and *AtMYB12* tomato fruit were harvested three days after breaker. Nuclei from both fruit were isolated and nuclear protein extracts were assessed by western blot. Coomassie brilliant blue staining (CBB) showed equal loading of proteins from WT and *AtMYB12* tomato extracts. **(b)** AtMYB12 antibody detects both SIMYB12 and AtMYB12, but not AtMYB75 recombinant proteins. *AtMYB12*, *SIMYB12* and *AtMYB75* cDNAs were cloned into the pDEST17 plasmid (6 x His tag at N terminal). Recombinant proteins were produced in *E.coli* and total protein extracts were loaded on two identical gels. Both anti-AtMYB12 and anti-6 x His antibodies were used for the western blots.

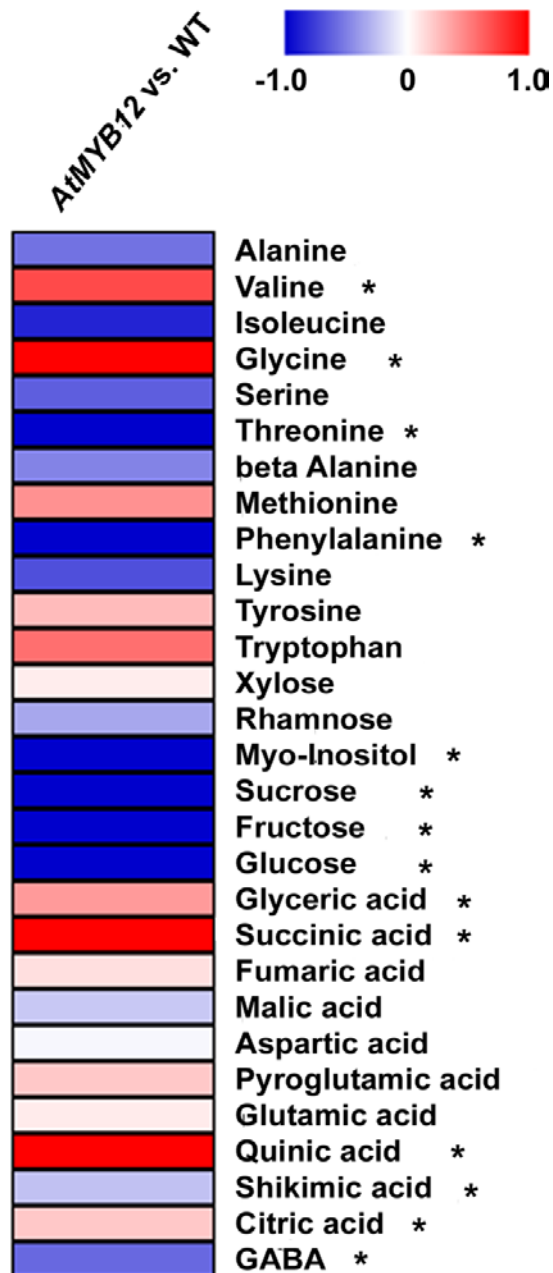

**Supplementary Figure 2. Quantitative determination (nM g fresh wt<sup>-1</sup>) of metabolite concentrations in fruit (10 dpb) of *AtMYB12* and *WT* tomato lines.** The heat map compares the levels in *AtMYB12* tomato with those in *WT* fruit. Absolute values were scaled by log2. Asterisks indicate values that were determined by the Student's *t* test to be significantly different ( $p < 0.05$ ) ( $n=4$ , Student's *t* test).

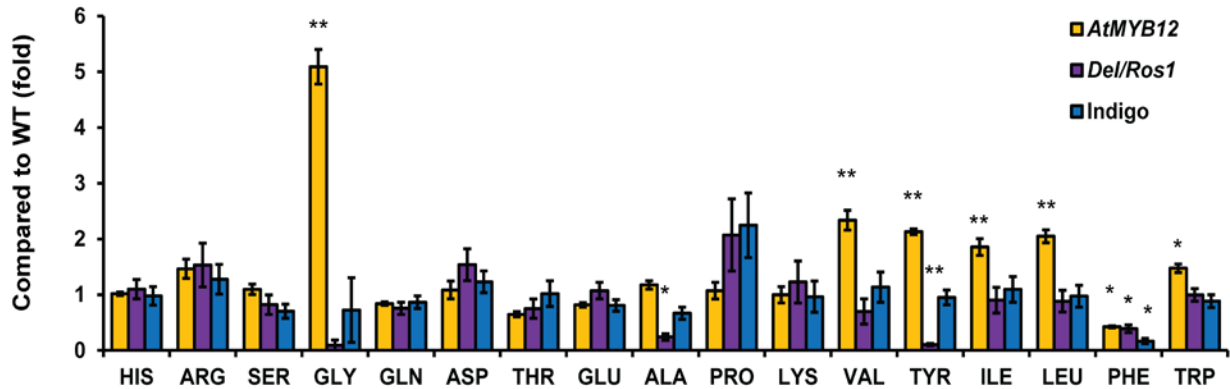

**Supplementary Figure 3. *AtMYB12* and *Del/Ros1* tomatoes showed different patterns of amino acid accumulation.** Fruit were harvested and analysed 7 days after breaker. Data show levels in different lines compared to those in WT tomatoes. Error bars indicate SEM (n=4). \* (p<0.05) and \*\* (p<0.01) (Student's *t* test) indicate significant differences compared to WT fruit.

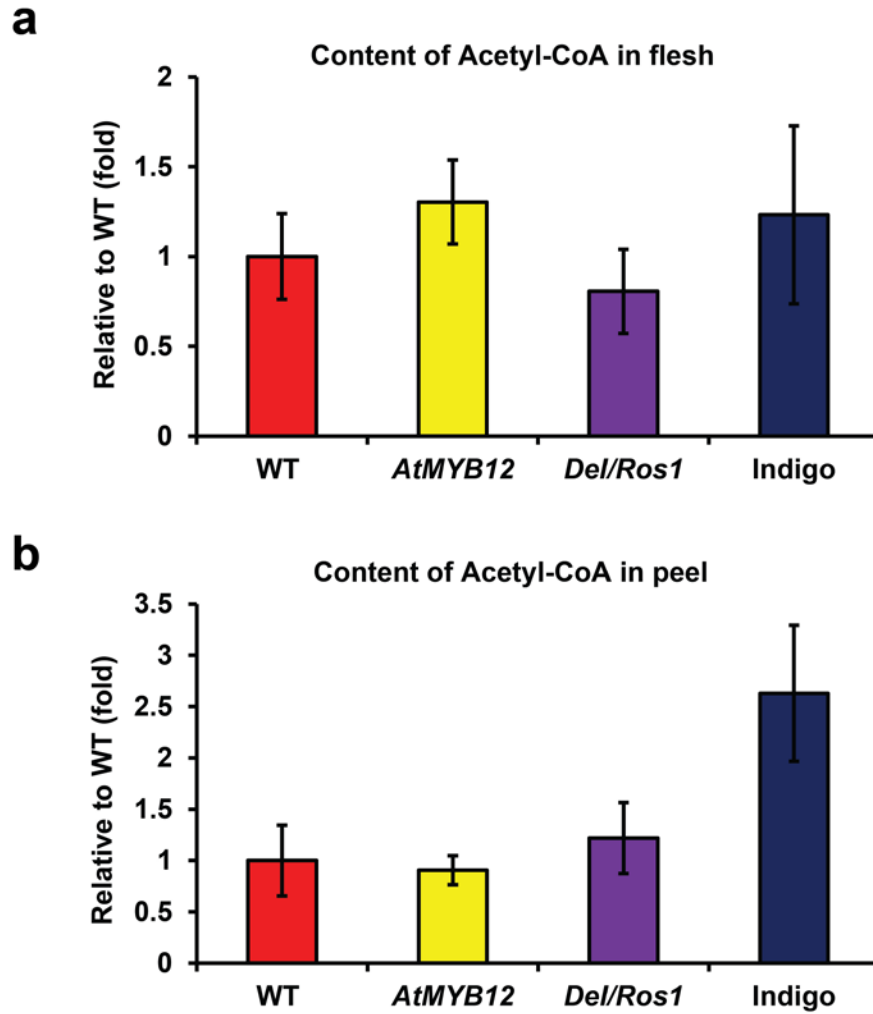

**Supplementary Figure 4. Acetyl-CoA contents of different fruit.** Fruit were harvest at 7 days after breaker. Both peel and flesh were analyzed for different lines. Data show the relative values compared to WT fruit for the same tissue. Error bars show SEM (n=4). No significant differences ( $p < 0.05$ , Student's *t* test) were observed for any of the genotypes compared to WT fruit.

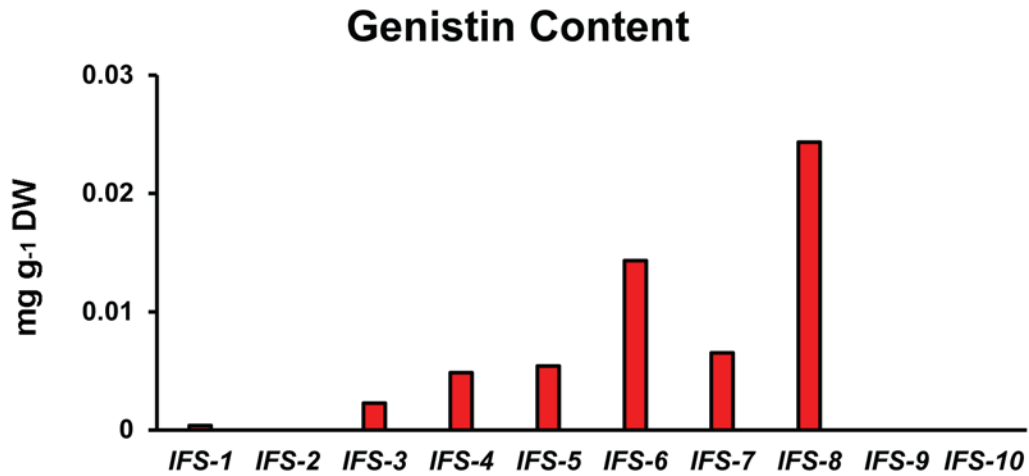

**Supplementary Figure 5. Genistin content in primary *LjIFS* transformants of MicroTom tomato.** Extracts of ten different T0 *IFS* tomato lines were analysed by LC-MS. For every plant, ripe fruit were pooled and analysed. Genistin, the major isoflavone detected, was used as a standard as a standard to evaluate isoflavone contents in different lines. Line 8 had the highest content of genistin and was selected for later experiments.

**a**

WT            TTC ATT GTC TCA **AGC** CAC TTA CAG  
 113 F I V S **S** H L Q 120

*are*            TTC ATT GTC TCA **AAC** CAC TTA CAG  
 113 F I V S **N** H L Q 120

**b**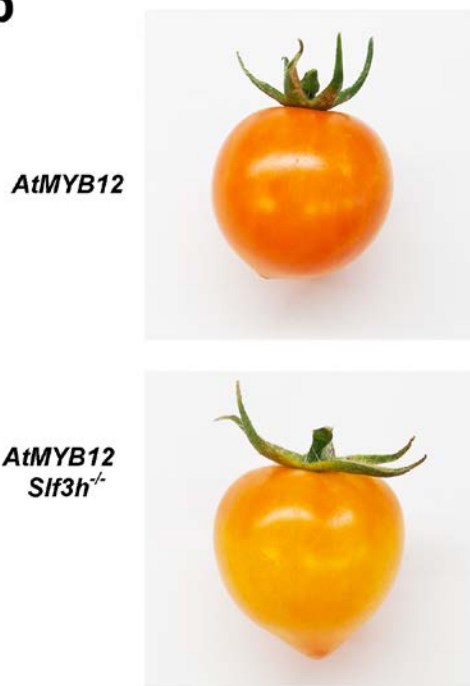**c**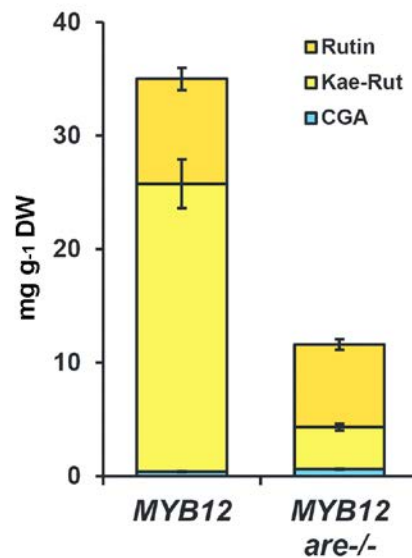

**Supplementary Figure 6. The *are* mutation affects F3H activity.** (a) The *are* mutant (3-073) has a G to A change in the coding sequence of the *SIF3H* (Soly02g083860) gene. This causes a change in the predicted amino acid sequence of F3H from S to N. (b) Phenotype of *AtMYB12* and *AtMYB12 are*<sup>-/-</sup> tomatoes. The *AtMYB12* tomato was crossed with the *are* mutant. F2 plants were genotyped and plants with *AtMYB12* and *Are* (<sup>+/+</sup> or <sup>+/-</sup>) or *AtMYB12 are*<sup>-/-</sup> were selected. Pictures were taken at 10 days after breaker. (c) The content of major flavonols in *AtMYB12* and *AtMYB12 are*<sup>-/-</sup> tomatoes. Fruit were harvested 10 days after breaker. Error bars indicate STDEV (n=3).

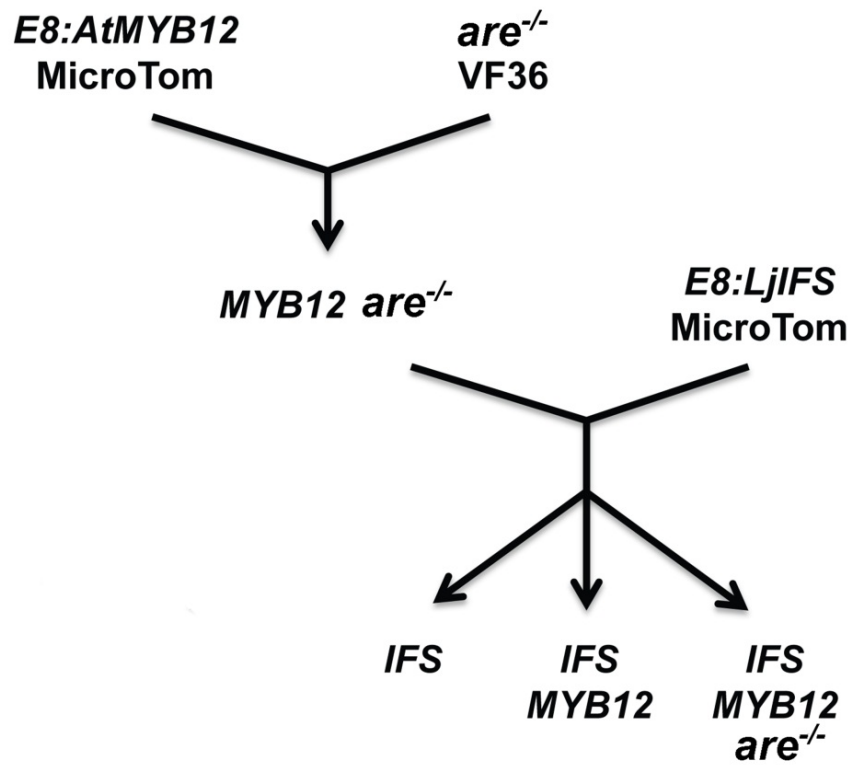

**Supplementary Figure 7. Schematic representation of the crossing strategy for tomatoes with high isoflavone content.** The *are*<sup>-/-</sup> mutant was first crossed with *AtMYB12* to make *AtMYB12 /are*<sup>-/-</sup> which was then crossed with the best *IFS* line. In the F<sub>2</sub> generation, segregation of different genes was analysed by genotyping.

## Supplementary Tables

**Supplementary Table 1. The ratio of  $^{14}\text{CO}_2$  evolution from C1 and C6 of glucose by fruits of wild type and *AtMYB12* tomatoes.** Ratios were calculated from the cumulative release of  $\text{CO}_2$  after 1, 2, 3, 4, 5 and 6 h incubation presented in **Fig 4a**. Each value represents the mean  $\pm$  SEM of four independent samples; and asterisks indicate values that were significantly different at ( $p \leq 0.05$ , Student's *t* test) from WT

|           | 1 hr.           | 2hr.            | 3 hr.           | 4 hr.           | 5 hr.           | 6 hr.            |
|-----------|-----------------|-----------------|-----------------|-----------------|-----------------|------------------|
| Wild Type | 0.60 $\pm$ 0.06 | 0.42 $\pm$ 0.06 | 0.38 $\pm$ 0.04 | 0.39 $\pm$ 0.04 | 0.41 $\pm$ 0.04 | 0.45 $\pm$ 0.06  |
| MYB12     | 0.53 $\pm$ 0.06 | 0.49 $\pm$ 0.05 | 0.51 $\pm$ 0.06 | 0.60 $\pm$ 0.10 | 0.68 $\pm$ 0.11 | 0.83* $\pm$ 0.13 |



**Supplementary Table 2. Metabolism of [U-<sup>14</sup>C] Glucose in pericarp disks from *AtMYB12* and WT fruit at 10dpb.** After 4 h of incubation, disks were extracted and fractioned. Values are means  $\pm$ SEM of determinations on four independent samples. Asterisks indicate values that were determined by the t-test to be significantly different ( $P < 0.05$ , Student's *t* test) from the wild type. FW, fresh weight

| Parameter                              | Wild Type                                | MYB12                 |
|----------------------------------------|------------------------------------------|-----------------------|
|                                        | Bq (gFW) <sup>-1</sup>                   |                       |
| Total uptake                           | 562.96 $\pm$ 34.09                       | 576.86 $\pm$ 32.55    |
| <b>Insoluble</b>                       |                                          |                       |
| Starch                                 | 4.74 $\pm$ 0.56                          | 3.94 $\pm$ 0.36       |
| Cell wall                              | 0.60 $\pm$ 0.07                          | 0.64 $\pm$ 0.13       |
| Protein                                | 0.19 $\pm$ 0.03                          | 0.16 $\pm$ 0.03       |
| <b>Soluble</b>                         |                                          |                       |
| Organic acids                          | 118.90 $\pm$ 18.89                       | 127.48 $\pm$ 17.57    |
| Phosphates esters                      | 105.98 $\pm$ 12.32                       | 121.39 $\pm$ 6.44     |
| Amino acids                            | 94.37 $\pm$ 15.72                        | 129.81 $\pm$ 13.67    |
| Sucrose                                | 238.18 $\pm$ 27.77                       | 193.44 $\pm$ 26.49    |
|                                        | Bq (nmol) <sup>-1</sup>                  |                       |
| Specific activity of hexose phosphates | 0.21 $\pm$ 0.01                          | 0.26* $\pm$ 0.04      |
| <b>Metabolic flux</b>                  |                                          |                       |
|                                        | nmol (gFW) <sup>-1</sup> h <sup>-1</sup> |                       |
| Starch                                 | 55.35 $\pm$ 6.34                         | 51.04 $\pm$ 9.11      |
| Cell wall                              | 6.95 $\pm$ 0.73                          | 8.00 $\pm$ 1.52       |
| Sucrose                                | 2781.28 $\pm$ 318.90                     | 2258.84 $\pm$ 371.90  |
| Carbohydrate oxidation                 | 2491.10 $\pm$ 112.85                     | 2999.54* $\pm$ 135.00 |

**Supplementary Table 3. Levels of major phenylpropanoids in WT, *AtMYB12*, *Del/Ros1* and Indigo (*AtMYB12* x *Del/Ros1*) tomatoes.** Values are means  $\pm$ SEM of determinations on three independent samples. \* (p<0.05) and \*\* (p<0.01) (Student's *t* test) indicate significant difference compared to WT fruit.

| Compounds<br>(mg g <sup>-1</sup> DW)         | WT                | <i>AtMYB12</i>       | <i>Del/Ros1</i>     | Indigo               |
|----------------------------------------------|-------------------|----------------------|---------------------|----------------------|
| Chlorogenic Acid                             | 0.150 $\pm$ 0.002 | 1.035** $\pm$ 0.163  | 0.363 $\pm$ 0.154   | 2.118** $\pm$ 0.406  |
| Kaempferol-3-Rutinoside                      | 0.073 $\pm$ 0.002 | 4.050** $\pm$ 0.469  | 0.276 $\pm$ 0.076   | 6.664* $\pm$ 2.110   |
| Rutin                                        | 0.894 $\pm$ 0.015 | 27.140** $\pm$ 2.070 | 5.183 $\pm$ 1.644   | 16.585** $\pm$ 0.981 |
| Quercetin-(Coumaroyl)-Rutinoside             | NA                | NA                   | 2.97** $\pm$ 0.62   | 30.21** $\pm$ 2.06   |
| Myricetin-(Coumaroyl)-Rutinoside             | NA                | 0.68** $\pm$ 0.03    | 1.19** $\pm$ 0.19   | 25.43** $\pm$ 3.41   |
| Methylmyricetin-(Coumaroyl)-Rutinoside       | NA                | NA                   | 0.72** $\pm$ 0.12   | 16.43* $\pm$ 4.55    |
| Delphinidin-(Coumaroyl)-Rutinoside-Glucoside | NA                | NA                   | 1.294** $\pm$ 0.187 | 1.154** $\pm$ 0.011  |
| Petunidin-(Coumaroyl)-Rutinoside-Glucoside   | NA                | NA                   | 1.477** $\pm$ 0.163 | 2.857** $\pm$ 0.218  |
| Petunidin-(Feruloyl)-Rutinoside-Glucoside    | NA                | NA                   | 0.420 $\pm$ 0.211   | 0.922** $\pm$ 0.102  |
| Malvidin-(Coumaroyl)-Rutinoside-Glucoside    | NA                | NA                   | NA                  | 0.598** $\pm$ 0.011  |

**Supplementary Table 4. Contents of major phenylpropanoids in WT, *StSy*, *AtMYB12* and *AtMYB12 StSy* tomatoes.** Values are means  $\pm$ SEM of determinations on three independent samples. \* ( $p < 0.05$ ) and \*\* ( $p < 0.01$ ) (Student's *t* test) indicate significant differences compared to WT fruit.

| Compounds<br>(mg g <sup>-1</sup> DW) | WT                | <i>StSy</i>         | <i>AtMYB12</i>       | <i>AtMYB12 StSy</i> | <i>AtMYB12 StSy are-/-</i> |
|--------------------------------------|-------------------|---------------------|----------------------|---------------------|----------------------------|
| Chlorogenic Acid                     | 0.117 $\pm$ 0.008 | 0.192 $\pm$ 0.024   | 0.912** $\pm$ 0.022  | 0.180 $\pm$ 0.106   | 0.200 $\pm$ 0.135          |
| Kaempferol-3-Rutinoside              | 0.351 $\pm$ 0.020 | 0.118* $\pm$ 0.014  | 20.934** $\pm$ 0.450 | 0.779* $\pm$ 0.089  | 1.393 $\pm$ 0.267          |
| Rutin                                | 1.649 $\pm$ 0.153 | 0.118** $\pm$ 0.009 | 12.770** $\pm$ 0.382 | 0.129** $\pm$ 0.016 | 1.011 $\pm$ 0.213          |
| Resveratrol                          | 0.018 $\pm$ 0.007 | 0.519** $\pm$ 0.044 | 0.011 $\pm$ 0.004    | 0.447 $\pm$ 0.106   | 0.297 $\pm$ 0.130          |
| Piceid                               | 0.011 $\pm$ 0.011 | 0.688** $\pm$ 0.056 | NA                   | 2.824** $\pm$ 0.074 | 2.597* $\pm$ 0.418         |
| Resveratrol-Glucoside Isoform        | 0.047 $\pm$ 0.003 | 0.608** $\pm$ 0.051 | 0.038 $\pm$ 0.038    | 1.513** $\pm$ 0.081 | 1.717* $\pm$ 0.244         |
| Resveratrol-di-Glucosides            | 0.053 $\pm$ 0.053 | 0.379* $\pm$ 0.070  | NA                   | 0.487** $\pm$ 0.069 | 1.004** $\pm$ 0.124        |
| Methyl-Resveratrol-Glucosides        | 0.005 $\pm$ 0.005 | 0.036** $\pm$ 0.003 | NA                   | 0.992** $\pm$ 0.070 | 0.306 $\pm$ 0.088          |

‡ this could be an under estimate due to difficulties of extracting resveratrol and resveratrol derivatives completely by the protocol used.

**Supplementary Table 5. Content of major phenylpropanoids in WT, *IFS*, *AtMYB12 IFS* and *AtMYB12 IFS are<sup>-/-</sup>* tomatoes.** Values are means  $\pm$ SEM of determinations on three independent samples. \* ( $p < 0.05$ ) and \*\* ( $p < 0.01$ ) (Student's *t* test) indicate significant differences compared to WT fruit.

| Compounds<br>(mg g <sup>-1</sup> DW) | WT                | <i>IFS</i>          | <i>AtMYB12 IFS</i>   | <i>AtMYB12 IFS are<sup>-/-</sup></i> | <i>IFS are<sup>-/-</sup></i> |
|--------------------------------------|-------------------|---------------------|----------------------|--------------------------------------|------------------------------|
| Chlorogenic Acid                     | 0.102 $\pm$ 0.006 | 0.280* $\pm$ 0.029  | 0.589** $\pm$ 0.040  | 0.495** $\pm$ 0.025                  | 0.150* $\pm$ 0.017           |
| Kaempferol-3-Rutinoside              | 0.298 $\pm$ 0.027 | 0.105* $\pm$ 0.008  | 41.693** $\pm$ 2.774 | 3.88** $\pm$ 0.283                   | 0.094* $\pm$ 0.010           |
| Rutin                                | 1.458 $\pm$ 0.093 | 0.799** $\pm$ 0.096 | 22.197** $\pm$ 1.258 | 3.032** $\pm$ 0.200                  | 0.148** $\pm$ 0.017          |
| Genistein                            | 0.105 $\pm$ 0.007 | 0.278* $\pm$ 0.032  | 0.220** $\pm$ 0.013  | 0.738** $\pm$ 0.053                  | 0.160* $\pm$ 0.018           |
| Genistin                             | 0.011 $\pm$ 0.001 | NA                  | 10.854** $\pm$ 0.706 | 76.221** $\pm$ 4.078                 | 0.170** $\pm$ 0.012          |
| Genistein-di-Glucosides              | NA                | 0.013 $\pm$ 0.007   | NA                   | 1.729* $\pm$ 0.127                   | NA                           |

‡These data were derived from the best lines segregating in the F2 population.

**Supplementary Table 6. Oligonucleotides used in ChIP-qPCR experiments**

| ID             | Symbol        | Full Name                                                 | ChIP-qPCR Primer Sequence (5'-3')                         |
|----------------|---------------|-----------------------------------------------------------|-----------------------------------------------------------|
| Solyc02g093830 | <i>G6PD</i>   | Glucose-6-phosphate 1-dehydrogenase                       | GTCAGTGGCTCTTATGATTCTGG<br>GTCTTCTGGATGATCCTTCTGTG        |
| Solyc05g012110 | <i>PGLS</i>   | 6-phosphogluconolactonase                                 | GTGGTATCCCACAAGGTAAAGTT<br>AATACAACATGAATTTTGCTATGCT      |
| Solyc04g005160 | <i>6PGD1</i>  | 6-phosphogluconate dehydrogenase                          | ATCCAGTACAAATGGAAGAATGG<br>TTCCCTTACAATGAAATGAAAACA       |
| Solyc05g010260 | <i>6PGD2</i>  | 6-phosphogluconate dehydrogenase                          | TCGTGACTTTTGGTTCCTTTCTTTAG<br>ATGATATTTCTGCTAGCATCCACTC   |
| Solyc05g008370 | <i>Rpi</i>    | Ribose-5-phosphate isomerase                              | ATTCCACAAGTTCCAATCTTGATAA<br>GATGAAAAATCAAGAAACAGAGGAA    |
| Solyc05g007260 | <i>Rpe</i>    | Ribulose-phosphate 3-epimerase                            | TGGAGCATAATTAATCAAACCCTA<br>GCATTCAATAATTAATACTAGGGAAAA   |
| Solyc10g018300 | <i>TKT</i>    | Transketolase 1                                           | AGGAGCCAAAATAAGCAAAATAAGT<br>ATGTTTTGTGGATGAAATTGAAAAAT   |
| Solyc00g006800 | <i>TALDOI</i> | Transaldolase                                             | AAACCAAAAGAGTAATTAGAAATACCA<br>TTTAAGGGTTGTTGTACCTCACTTAT |
| Solyc07g042550 | <i>SUS1</i>   | Sucrose synthase                                          | TAAAAGAGCTTAGCAGGCAAACA<br>GGAATGGTAGAGGTCCCTTTTTTA       |
| Solyc12g095760 | <i>PFK1</i>   | Diphosphate-fructose-6-phosphate 1-phosphotransferase     | CAAAACAATAAGGACCATTTCCATC<br>CCCGCTCTGAAAATACGGTTTAT      |
| Solyc03g111010 | <i>GADPH</i>  | Glyceraldehyde-3-phosphate dehydrogenase                  | ACGATAGTGAAAATCCTCAACGA<br>AACAGAGTAGTGGAGTTGTTGGTG       |
| Solyc04g009030 | <i>GADPHL</i> | Glyceraldehyde-3-phosphate dehydrogenase like             | TCATTTTGTAAAGTTGAAGTGTTCG<br>CGCTCAACTTGTCTTTAAATGCT      |
| Solyc04g072800 | <i>PGM</i>    | 2,3-bisphosphoglycerate-dependent phosphoglycerate mutase | GGTAACTCTGGATTGTGTCCTGA<br>CAAAAACCTCCTCCTCTCAACAA        |
| Solyc03g114500 | <i>ENO</i>    | Enolase                                                   | ATTTTCGTACGCTCGTGTC<br>TGCTTTGGAGGAGACGTTAG               |
| Solyc04g074480 | <i>DAHPS</i>  | 3-deoxy-7-phosphoheptulonate synthase                     | CACATATTTTTCCTAAAATACCCTTT<br>GGAATGGGGTTTTATAAGGAGGT     |
| Solyc02g083590 | <i>DHQS</i>   | Dehydroquininate synthase                                 | GATGGATCACTCGTCCAGTAAAG<br>GTCAGGTTGATCAAGAAGTCCAG        |
| Solyc06g084460 | <i>DHQD</i>   | Dehydroquininate dehydratase                              | ACTTGATTTGGCAAAAAGAAAAGAT<br>AATCCTACTTAGAGACATTGTTTTTGT  |
| Solyc01g067750 | <i>SHD</i>    | Shikimate dehydrogenase                                   | CACGTTTGGTACTCTTGAAGTGG<br>GTATCTGGTCCCAACTGTCTGAA        |
| Solyc04g051860 | <i>SK</i>     | Shikimate kinase                                          | GGACGATGTGTATACCTTGTGG<br>CTCTATCAGCCTGTCACAGTCAA         |
| Solyc05g050980 | <i>EPSPS1</i> | 3-phosphoshikimate 1-carboxyvinyltransferase              | CCTCCTATGTGGTTTGGCAGC<br>AACGAAAATTTGCGGTTGCT             |
| Solyc01g091190 | <i>EPSPS2</i> | 3-phosphoshikimate 1-carboxyvinyltransferase              | CCAAACAGTTAAATAAGTCAAAAATCA<br>TTATTAGAGCCTGTTTGGCTCAG    |
| Solyc04g049350 | <i>CS</i>     | Chorismate synthase                                       | TAGAAATCTGCCCTCTTGAAT                                     |

| ID             | Symbol          | Full Name                                                            | ChIP-qPCR Primer Sequence (5'-3')                                            |
|----------------|-----------------|----------------------------------------------------------------------|------------------------------------------------------------------------------|
| Solyc02g088460 | <i>CMI</i>      | Chorismate mutase 1                                                  | TAGACGAGTCATTTGATCCACCA<br>GGTAGTAGGAGGATATCGCATCA<br>TGGGTTTTGGAGTTAGGTGAGT |
| Solyc04g054710 | <i>PAT</i>      | Prephenate aminotransferase                                          | TACTTCACCAACCAAAGAGGAAA<br>GTGAGTGAAACAGAAGAGGGTTG                           |
| Solyc07g007590 | <i>ADT</i>      | Prephenate dehydrogenase family protein                              | GAAATCGAAGCCGATTTACACAA<br>AGAGGACTTTTTCCACGAAGCAC                           |
| Solyc09g007920 | <i>PAL5A</i>    | Phenylalanine ammonia-lyase                                          | TGGCTATAATTAATCTTCCAACAACCA<br>AGAGAGGAACAAAGGATGGTAGG                       |
| Solyc09g007910 | <i>PAL5B</i>    | Phenylalanine ammonia-lyase                                          | TGGCCATGATTAATCTTTCAACAA<br>GGGGAACTAATAGATGGTAGGTA                          |
| Solyc09g007900 | <i>PAL5C</i>    | Phenylalanine ammonia-lyase                                          | TTGAAGTCAAAGGACACAATAATGGA<br>ATATGTGAGAGGGGGTTGCTAGG                        |
| Solyc09g007890 | <i>PAL5D</i>    | Phenylalanine ammonia-lyase                                          | ACCAACTCACCCCTCACATATC<br>ATTTTTGTTGTTGTTTTGGTGGTG                           |
| Solyc10g086180 | <i>PAL</i>      | Phenylalanine ammonia-lyase                                          | CGGTCCATATAATTCCTTATGTCCA<br>AGGTGAGTTGATAAGGGGTCCAT                         |
| Solyc03g117870 | <i>4CL</i>      | 4-coumarate CoA ligase                                               | TTGTATCCCCCAAAAAGGAAAAA<br>CCTGTGGTAGGTGAAAGGGAGTT                           |
| Solyc06g035960 | <i>4CL-Like</i> | 4-coumarate-CoA ligase-like                                          | ATTGAGGAAATATGCCCTCTCCA<br>GCGGCAATATAAATGCAATGAAG                           |
| Solyc09g091510 | <i>CHS-1</i>    | Chalcone synthase -1                                                 | TCTTAAATTTAGAAAGGAAAACCAAAA<br>TCCAAAAGAAAAAGAATGGTAGC                       |
| Solyc05g053550 | <i>CHS-2</i>    | Chalcone synthase -2                                                 | ACGAAAAATAAGAGTTGGGGAAA<br>CATAACAACTGGTAGGCGGTAG                            |
| Solyc05g010320 | <i>CHI</i>      | Chalcone-flavonone isomerase                                         | TCTCGAAATACGAAATAATTGAGG<br>GTACGGTTAATGGCTCACAGTTC                          |
| Solyc05g052240 | <i>CHIL</i>     | Chalcone-flavonone isomerase like                                    | CTTTCCAAATACTCGTGTCAAGC<br>AGCTACCACACAATCTACCTTCC                           |
| Solyc02g083860 | <i>F3H</i>      | Flavanone 3-hydroxylase                                              | CATAATTTTCAAACCAAGTATGGTGGT<br>CGTGCCAACTAACAACATTTTAC                       |
| Solyc11g013110 | <i>FLS</i>      | Flavonol synthase                                                    | AATTAAGGCAAAAAGTAGGTTTGAA<br>TTATAGGAAAGTGACGCGGTGT                          |
| Solyc02g089770 | <i>DFRL1</i>    | Dihydroflavonol-4-reductase like                                     | AACTCCTGCAATTAGTCTTTCACA<br>CATCCGAGCATATAAGAAACCAA                          |
| Solyc01g068080 | <i>DFRL2</i>    | Dihydroflavonol-4-reductase like                                     | AGTACAACGCGGCGTATCACTAT<br>TTCTATGGCTTCGAGTTAGAAAAA                          |
| Solyc08g080040 | <i>ANS</i>      | Anthocyanidin synthase                                               | ATGCATGGTGGTTGTTGAATGTT<br>AATTCTTCCCCTTAGGGTGATTT                           |
| Solyc10g083440 | <i>3GT</i>      | UDP flavonoid 3-O-glucosyltransferase                                | ACAAAATCCTCATGCTATCAACC<br>CTTCTTTGTTGGTGGTTAAAAA                            |
| Solyc03g117600 | <i>HCT</i>      | Hydroxycinnamoyl-CoA shikimate/quininate hydroxycinnamoyltransferase | TTTTCTTAAATTACGTATCAGGTTTTT<br>TGAGTTTCTTATATAGTATTGGGAAGG                   |
| Solyc10g078240 | <i>C3H</i>      | <i>p</i> -coumarate 3' -hydrolase                                    | ACCAGCCACGTGATTGAGAAAT<br>TTGCGTTTTGGAGTTTTGGTAGGT                           |

**Supplementary Table 7. Oligonucleotides used in RT-qPCR experiments**

| ID             | Symbol        | RT-qPCR Primer Sequence (5'-3')                      |
|----------------|---------------|------------------------------------------------------|
| Solyc02g093830 | <i>G6PD</i>   | GTCAGTGGCTCTTATGATTCTGG<br>GTCTTCTGGATGATCCTTCTGTG   |
| Solyc05g008370 | <i>Rpi</i>    | TCTTCCTCTGTTTCCCCTGTTA<br>CTGTTGACCCTGTACCTAAACCA    |
| Solyc10g018300 | <i>TKT</i>    | GTCTAGGAGAAGACGGTCCAAC<br>TAAGCTCCTGCTGTCTCATTACC    |
| Solyc07g042550 | <i>SUS1</i>   | GTTAGGTGTAACACAGTGCACCA<br>AGCTGTGAACTGAGCTGAGAAGT   |
| Solyc12g095760 | <i>PFK1</i>   | GCACTCTGCAGTCACATCCTAAT<br>TCAGCCCTAGCTTGAAGTGTATC   |
| Solyc04g072800 | <i>PGM</i>    | GACAAGCTAACATCCCAAGAGGT<br>AGGACTTCCTCTGCGAATATAACC  |
| Solyc03g114500 | <i>ENO</i>    | GGATGTAGCAGCATCTGAGTTCT<br>GGCTCTGAGCACTAAGTACATGA   |
| Solyc04g074480 | <i>DAHPS</i>  | CCTTCACTATGATTGCTCTGCTC<br>TCACTCACCTTAATACCGAGAGG   |
| Solyc02g083590 | <i>DHQS</i>   | GATGGATCACTCGTCCAGTAAAG<br>GTCAGGTTGATCAAGAAGTCCAG   |
| Solyc01g067750 | <i>SHD</i>    | CACGTTTGGTACTCTTGAAGTGG<br>GTATCTGGTCCCAACTGTCTGAA   |
| Solyc04g051860 | <i>SK</i>     | GGACGATGTGTATACCTTGTGG<br>CTCTATCAGCCTGTCACAGTCAA    |
| Solyc04g049350 | <i>CS</i>     | CAGGGCGGTATATCAAATGG<br>GCGATGAGTTCTGTTTCGTG         |
| Solyc02g088460 | <i>CM1</i>    | CAGTATCCAAAGGTTCTGCACTC<br>TGCCTTCCTTCACTAATCTTGG    |
| Solyc07g007590 | <i>ADT</i>    | GTCACAAGTCAGTCACCACCAT<br>AGCCTACCTGACTGAGCATATTG    |
| Solyc00g282510 | <i>PAL</i>    | AATTGCTTCGAGTCGTGGATAG<br>ACAAGGACTTGTCTCAGCTTCTG    |
| Solyc09g091510 | <i>CHS-1</i>  | CCTTTATTTGAACTCGTCTCAGC<br>CAGGAACATCCTTGAGTAAGTGG   |
| Solyc05g053550 | <i>CHS-2</i>  | CGGGCTACTAGGCAAGTTTTAAG<br>CCTGTGGTACTAAGCCCTTCTTT   |
| Solyc05g010320 | <i>CHI</i>    | TTGTCAACTCGGTCTAATGTGTC<br>TAAAGTGGGACCTTATTGCACAC   |
| Solyc02g083860 | <i>F3H</i>    | ATGGATGAGCCGATTACATTTG<br>TGGCCTCTTCAGTTTGTATCTTC    |
| Solyc11g066580 | <i>F3'5'H</i> | CTCAACGCCACTAAATCTCCCTA<br>TTGCCCATATGTTGACACTAAGC   |
| Solyc03g115220 | <i>F3'H</i>   | TATAGCTGGGACAGACACATCCT<br>CTACTTTGTGATCTCCTGTTGG    |
| Solyc02g085020 | <i>DFR</i>    | GACTTGCCGACAGAAGCAAT<br>GTGCATTCTCCTTGCCACTT         |
| Solyc08g080040 | <i>ANS</i>    | ACGAACAGGATTTTGCTGCT<br>TTGAGCTCAGCAACTGCAT          |
| Solyc11g013110 | <i>FLS</i>    | TGTCCCATATCACCTTCTTGTGTC<br>TCACCAATGTGGACAATTATAGCA |
